# Supplementary material
Source: PubMed Central journal article supplement (PMC3745370)

## **Supplemental Information**

- 1. Supplemental Materials and methods**
- 2. Supplemental Table S1.**
- 3. Figure legends for Supplemental Figures 1-6.**
- 4. Supplemental Figures 1-6.**

### **1. Supplemental Materials and methods**

*Antibodies.* Mouse anti-trimeric Tn (tTn) antibody (MLS128) was generated by Numata et al. (1). Goat anti-ppGalNAc-T13 antibody (T-18), rabbit anti-Syndecan-1 (Sdc1) antibody (H-174), rabbit anti-integrin  $\alpha$ 5 antibody (H-104) and anti-integrin  $\beta$ 1 antibody (M-106), hamster anti-integrin  $\beta$ 1 antibody (Hm $\beta$ 1-1), rabbit anti-FAK antibody (C-20), rabbit anti-phospho-FAK antibodies (Tyr-576, Tyr-577, Tyr-861, and Tyr-925), anti-phospho-paxillin antibodies (Tyr-31 and Tyr-181) and normal Syrian hamster IgG were purchased from Santa cruz Biotechnology (Santa cruz, CA). Rat anti-Syndecan-1 antibody (281-2) and rabbit anti-phospho-FAK antibody (Tyr-397) were from BD Transduction Laboratories (San Jose, CA). Mouse anti-phospho-paxillin (Tyr-118) and anti-rabbit IgG antibody conjugated with HRP were from Cell Signaling Technology (Beverly, MA). Anti-mouse IgG antibody conjugated with horseradish peroxidase (HRP) was purchased from Amersham Bioscience. Anti-rabbit IgG antibody conjugated with HRP was from Cell Signaling Technology. FITC-labeled anti-mouse IgG antibody was purchased from ICN/Cappel (Durham, NC). FITC-labeled streptavidin was from EY Laboratories, Inc. (San Mateo, CA). Anti-mouse IgG conjugated with HRP (Mouse TrueBlot<sup>TM</sup> ULTRA) was from Bay bioscience (Kobe, Japan). Anti-rat IgG antibody conjugated with Alexa405, anti-rabbit IgG antibody conjugated with Alexa488 and anti-mouse IgG antibody conjugated with Alexa564 were purchased from Invitrogen (Carlsbad, CA).

*Cell lines and culture.* Establishment of high metastatic sublines (C4-ly; lymph node, C4-sc; lung) from Lewis lung cancer cell line (sublines) H7 and C4 was as described (2). These sublines were maintained in Dulbecco's modified Eagle's medium (DMEM) supplemented with 7.5% fetal bovine serum (FBS) at 37 °C in a humidified atmosphere containing 5% CO<sub>2</sub>. Establishment of stable transfectant cells of *ppGalNAc-T13* cDNA (*T13-TF*) and control cells was as described (3). These clones were cultured in DMEM

supplemented with 7.5% FBS and G418 (350  $\mu\text{g/ml}$ ). Establishment of stable knockdown cells of *ppGalNAc-T13* gene (*T13-KD*) and control cells was as described (3). These clones were cultured in DMEM supplemented with 7.5% FBS and blasticidin (2  $\mu\text{g/ml}$ ). GM1 synthase RNAi transfectant (GM1-Si) cells and control cells were cultured in DMEM supplemented with 7.5% FBS and puromycin (6  $\mu\text{g/ml}$ ) (Calbiochem).

*Cell adhesion assays using RT-CES system.* Cells ( $2.5 \times 10^4$ ) were added on ACEA e-plates coated with ECM proteins. The adhesion of cells was monitored continuously using the RT-CES system (Wako Pure Chemical, Osaka, Japan) for 24 h. In order to block the cell adhesion in which tTn antigen is involved, cells were pretreated with anti-tTn mAb (10  $\mu\text{g/ml}$ ) or control IgG in serum-free medium for 30 min.

*Immunofluorescence.* Cells were plated on pre-coated plates with FN after being treated and rotated under serum-free conditions. After incubation for 0, 5, 15 and 30 min, cells were fixed in paraformaldehyde (4% in PBS for 10 min) and treated with 0.1% Triton X-100 in PBS for 10 min at room temperature. Nonspecific binding was blocked with 2.5% BSA in PBS for 60 min at room temperature. Cells were stained with the first antibodies (rat anti-Sdc1 pAb, rabbit anti-integrin  $\beta 1$  pAb or mouse anti-tTn mAb) in PBS containing 0.5% BSA for 60 min at room temperature, then with anti-rat IgG conjugated with Alexa405, anti-rabbit IgG conjugated with Alexa488 and anti-mouse IgG conjugated with Alexa564 in PBS containing 0.5% BSA for 45 min at room temperature. The resulting staining patterns were imaged using a confocal microscope (Fluoview FV10i, Olympus, Tokyo, Japan). It was confirmed that there is no cross-reaction between the authentic antigens and non-relevant secondary reagents. DIC indicates images of differential interference contrast microscope.

*Isolation of raft fraction.* GEM/rafts were isolated using a detergent extraction method essentially as described by Mitsuda *et al.* (4). Cells ( $1.0 \times 10^7$ ) were plated in 15-cm culture dishes and cultured up to 90% confluency, and three dishes of cells were used for each preparation. After washing twice with ice-cold PBS, the cells were lysed in 1 ml of MNE/Triton X-100 buffer (1% Triton X-100, 25 mM MES-NaOH, pH 6.5, 150 mM NaCl, 5 mM EGTA, 1 mM  $\text{Na}_3\text{VO}_4$ , 1 mM PMSF, 1  $\mu\text{g/ml}$  aprotinin), and then Dounce-homogenized 15 times. Samples were placed on the bottom of

Ultra-Clear™ centrifuge tubes (Beckman Instruments) and mixed with an equal volume of 80% (w/v) sucrose in MNE buffer without Triton X-100. Then, 2 ml of 30% sucrose (w/v) in MNE buffer without Triton X-100 was overlaid, and 1 ml of 5% (w/v) sucrose in MNE buffer without Triton X-100 was layered on the top. The samples were centrifuged at  $100,000 \times g$  in an SW50.1 rotor for 16 h at 4 °C. The entire procedure was performed at 4 °C. From the top of the gradient, 0.5 ml of each fraction was collected to yield 10 fractions.

### **References**

1. Ref. 8 in text.
2. Ref. 6 in text.
3. Ref. 7 in text.
4. Ref. 9 in text.

## 2. Supplemental Table S1.

Sequences of siRNAs used in this study

| Gene symbol | accession No. | (*bp) | Sequences                  | (*bp) |
|-------------|---------------|-------|----------------------------|-------|
| Sdc1        | NM_011519     | 73    | 5'-TGGCTGTAAATGTTCCCTCC-3' | 92    |

\* bp indicates relative to start codon.

### 3. Figure legends for Supplemental Figures 1-8.

#### **Supplemental Fig. S1. tTn antigen on Sdc1 modulates invasion activity of Lewis lung cancer cells**

Transfection of *ppGalNAc-T13* cDNA in pCMV3B expression vector into C4 resulted in the establishment of stable transfectant lines (TF-1 and TF-2). Vector control lines (Vc-1 and Vc-2) were also generated. Transfection of anti-*ppGalNAc-T13* shRNA vector into C4-sc resulted in the establishment of stable transfectant lines (KD-1 and KD-2). Vector control lines (C-1 and C-2) were also generated. *Aa and Ab*, Immunoblotting was performed with anti-ppGalNAc-T13 pAb in *T13-TF* (a) and *T13-KD* (b) clones. *Ac and Ad*, Expression of tTn was analyzed by flow cytometry, and the results were presented by mean fluorescence intensity (MFI) of *T13-TF* (c) and *T13-KD* (d) clones. *Ae and Af*, Invasion assay, in which  $5 \times 10^5$  cells were seeded in the upper chamber in the absence of serum. After 24 h, invaded cell numbers were counted. Columns represent means  $\pm$  S.D. (n=3). *B*, Cells were solubilized in the lysis buffer containing Triton X-100, and the lysates were immunoprecipitated with 2  $\mu$ g of anti-tTn mAb or normal mouse IgG at 4 °C. After SDS-PAGE of the immunoprecipitates with an anti-tTn mAb, immunoblotting was performed with each Ab (a). IgG, normal mouse IgG; IP, immunoprecipitation with anti-tTn mAb. This is essentially same as reported previously (Ref. 7 in text). Band intensities of Sdc1 precipitated by anti-tTn antibody were scanned by a densitometry and presented as relative Sdc1/tTn (b).

#### **Supplemental Fig. S2. Trimeric Tn antigen-expressing cells showed increased cell adhesion to FN only, not other ECM proteins.**

Cells were seeded in 96-well e-plates at  $1.0 \times 10^4$  cells/well, and cell attachment and spreading were monitored by the RT-CES system. The e-plates were pre-coated with fibronectin (FN), laminin (LN), collagen type I (CLI) or poly-L-lysine (PLL) as described in “Experimental Procedures.”

#### **Supplemental Fig. S3. Expression of tTn antigen on Sdc1 increased cell adhesion to FN in an integrin-dependent manner**

Cells were seeded in the wells of 96-well e-plates at  $2.5 \times 10^4$  cells/well, and cell attachment and spreading were monitored by the RT-CES system. *A*, Morphology of

*T13*-KD lines (a, C-1; b, KD-1). *B*, The e-plates were pre-coated with poly-L-lysine (PLL) or fibronectin (FN) as described under “Experimental Procedures”. *C*, Knockdown with siRNA against *Sdc1* (*Sdc1*) in *T13*-KD lines was also analyzed by using FN-coated plates. A representative of three independent experiments was shown.

**Supplemental Fig. S4. Co-localization of *Sdc1*, integrin  $\beta 1$  and tTn antigen during adhesion to FN.**

*A*, C4-sc-derived C-1 and KD-1 cells were incubated for 0, 5, 15 and 30 min, and cells were fixed in paraformaldehyde (4% in PBS for 10 min) and treated with 0.1% Triton X-100 in PBS for 10 min at room temperature. Then, cells were stained for *Sdc1* (blue), ITG $\beta 1$  (green) and tTn (red), and their images were observed using a con-focal microscope. DIC, differential interference contrast microscope. *B*, Images of the y-z axis in Y (purple line). The right side in the image is the adhesion site. Images of the x-z axis in X (yellow line). The bottom side in the image is the adhesion site. Red boxes indicate co-localizing sites.

**Supplemental Fig. S5. Knockdown of ppGalNAc-T13 resulted in the suppression of lung metastasis.**

Metastasis experiments were performed using C4-sc-derived *T13*-KD lines. *A*, A histogram to depict the percentage of mice that developed lung metastasis after injection of each cell line. Bars represent  $\pm$  S. D. (C, KD; n=15). *B*, Primary tumors coalescent to fascia and peritoneum (a) and lung metastasis (b) in *T13*-KD. Arrows indicate metastasis foci. *C*, H&E staining and immunohistochemical staining by tTn mAb was performed using primary tumors (a) and lung sections (b) in *T13*-KD lines. Scale bar, 30  $\mu$ m.

**Supplemental Fig. S6. GM1-Si clones also exhibited increased invasion activity by formation of trimeric Tn antigen on *Sdc1* and modulation of lipid rafts.**

*A*, Immunoblotting was performed with anti-T13 pAb in GM1-Si lines (a) and invasion assay (b) was performed as described in “Experimental Procedures.” Columns represent means  $\pm$  S. D. (n=3). \*,  $P < 0.01$ . *B*, Expression levels of tTn were analyzed by flow cytometry with anti-tTn mAb. *C*, The lysates were immunoprecipitated with 2  $\mu$ g of anti-tTn mAb or normal IgG at 4 °C. Antibodies used for immunoblotting were as

indicated (a: anti-tTn mAb, b: anti-Sdc1 pAb). IgG, normal mouse IgG; IP, immunoprecipitation with anti-tTn mAb. *D*, GM1-Si clones were lysed using Triton X-100, and the extracts were fractionated with discontinuous sucrose density gradient centrifugation. Fractions were subjected to immunoblotting using the antibodies against the proteins indicated.

Supplemental Fig. S1

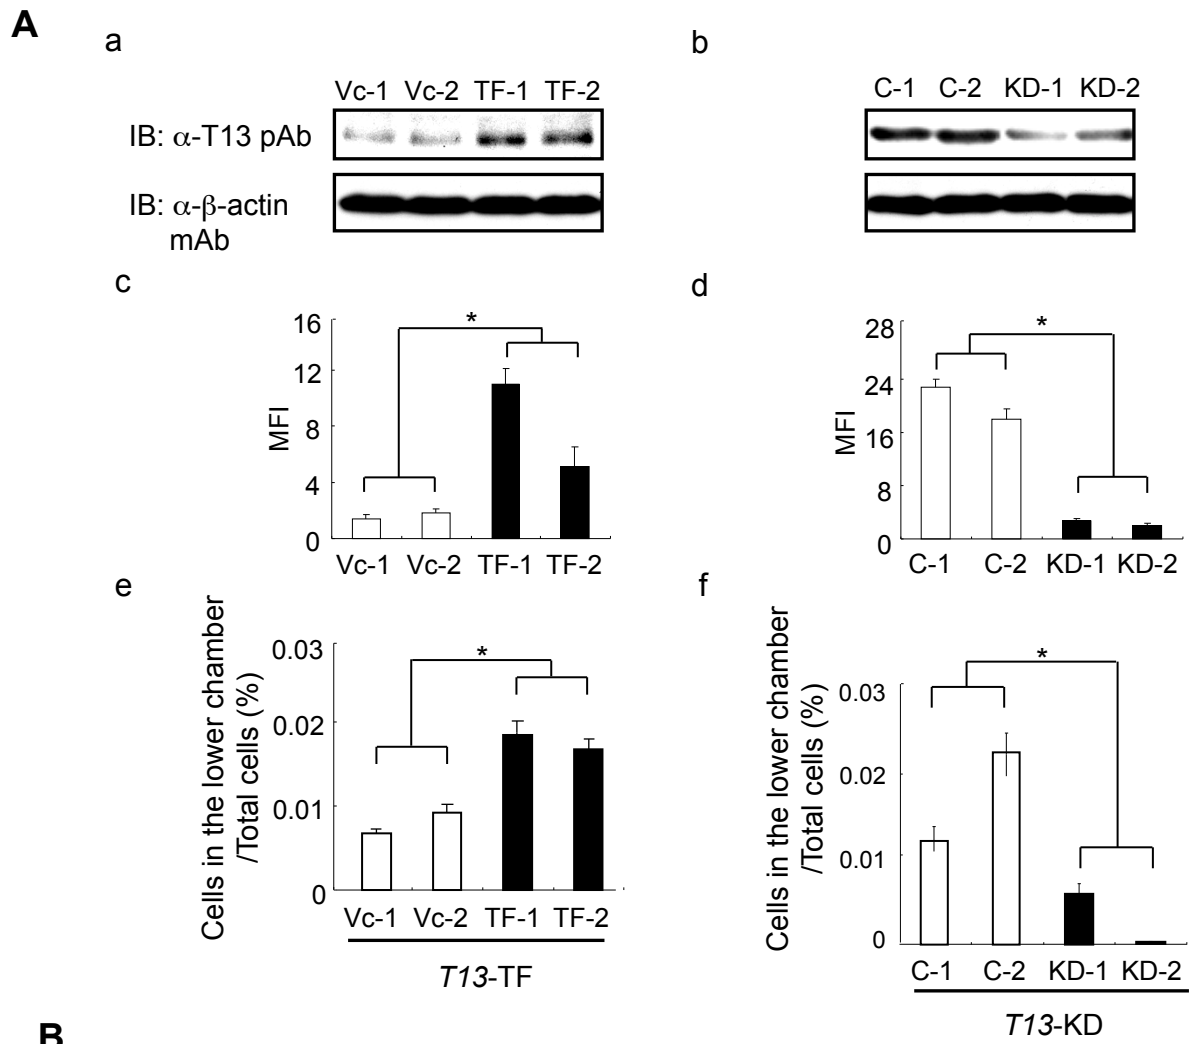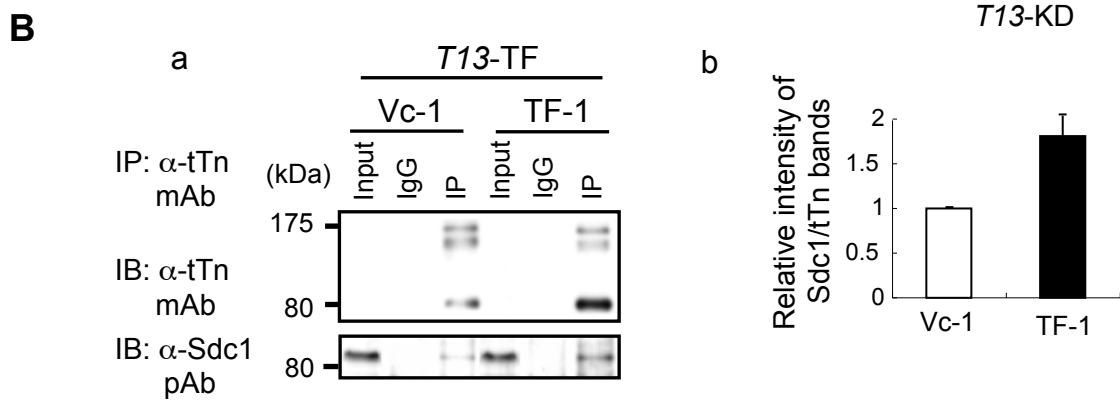



Supplemental Fig. S2

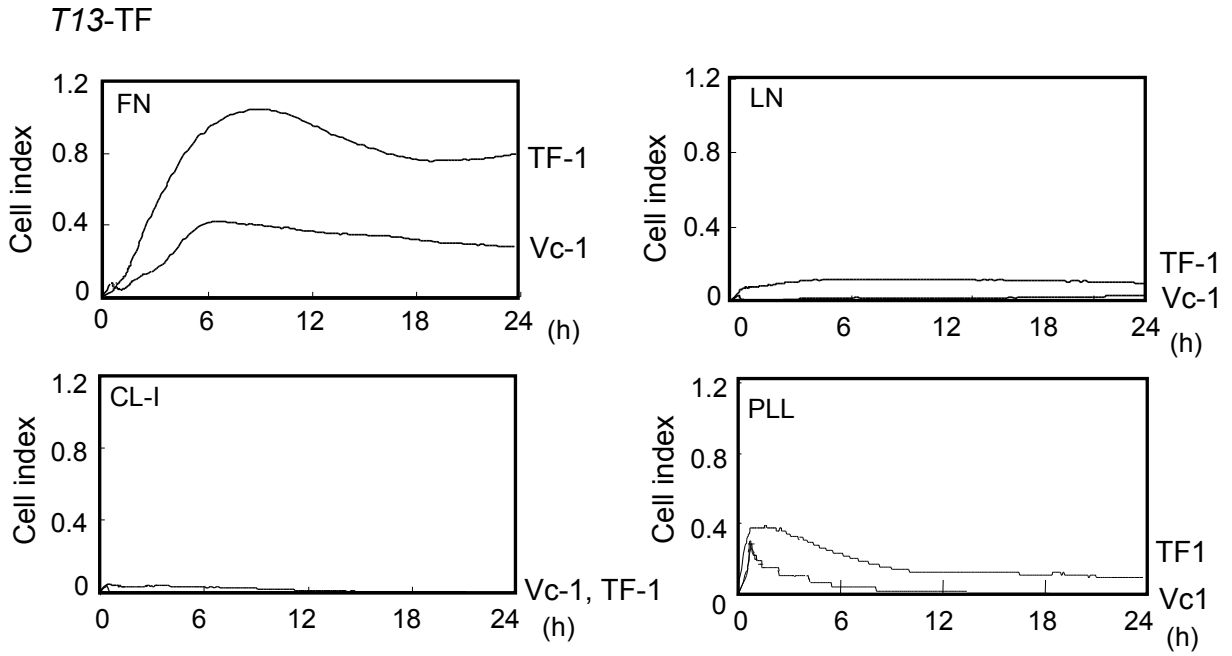

Supplemental Fig. S3

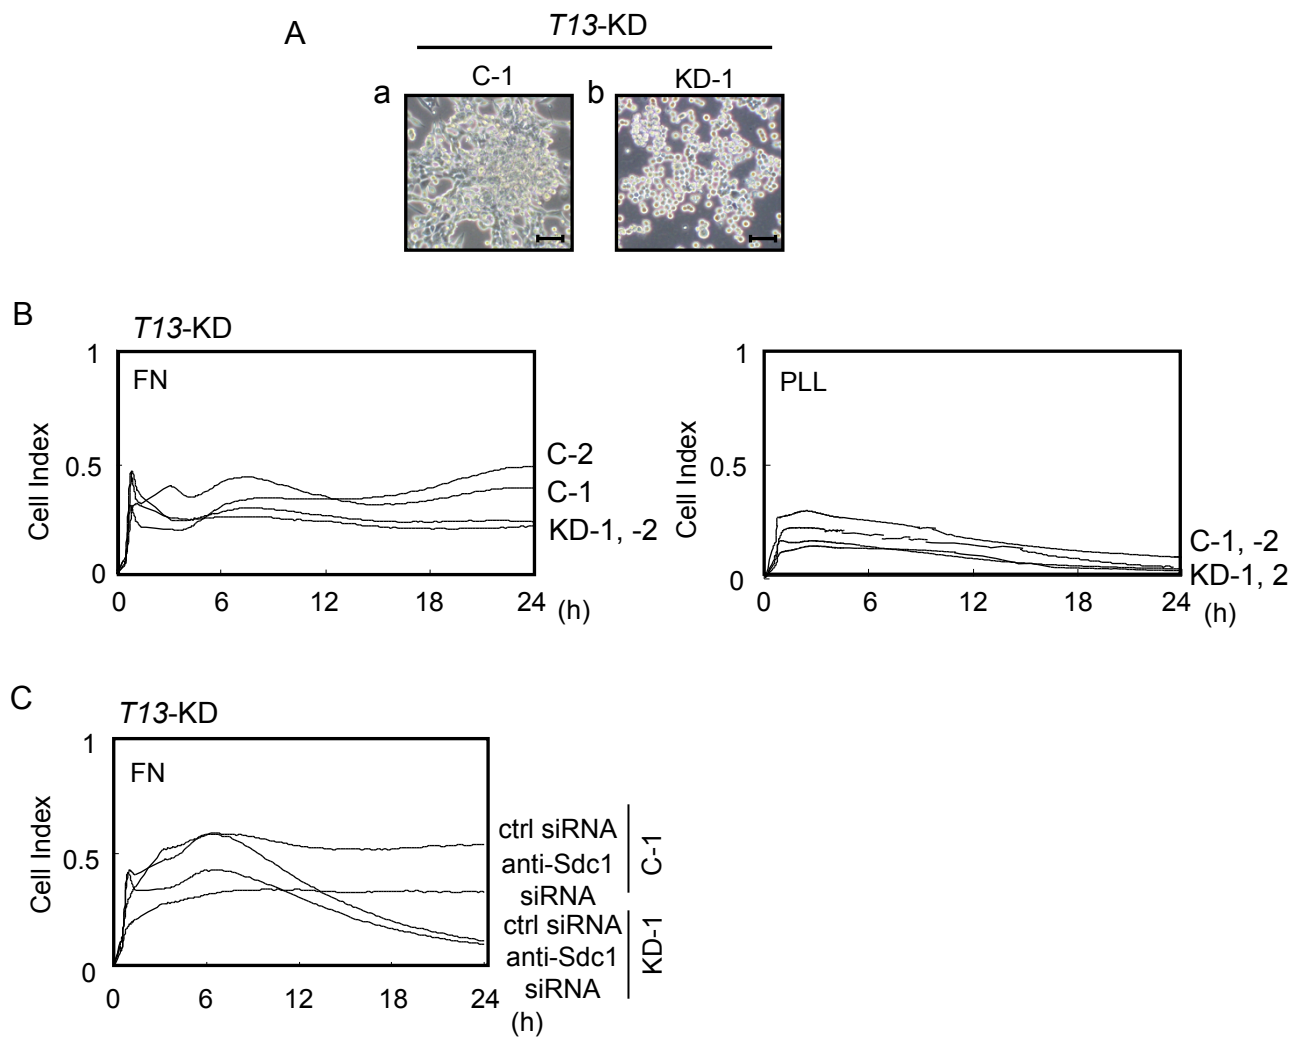

Supplemental Fig. S4

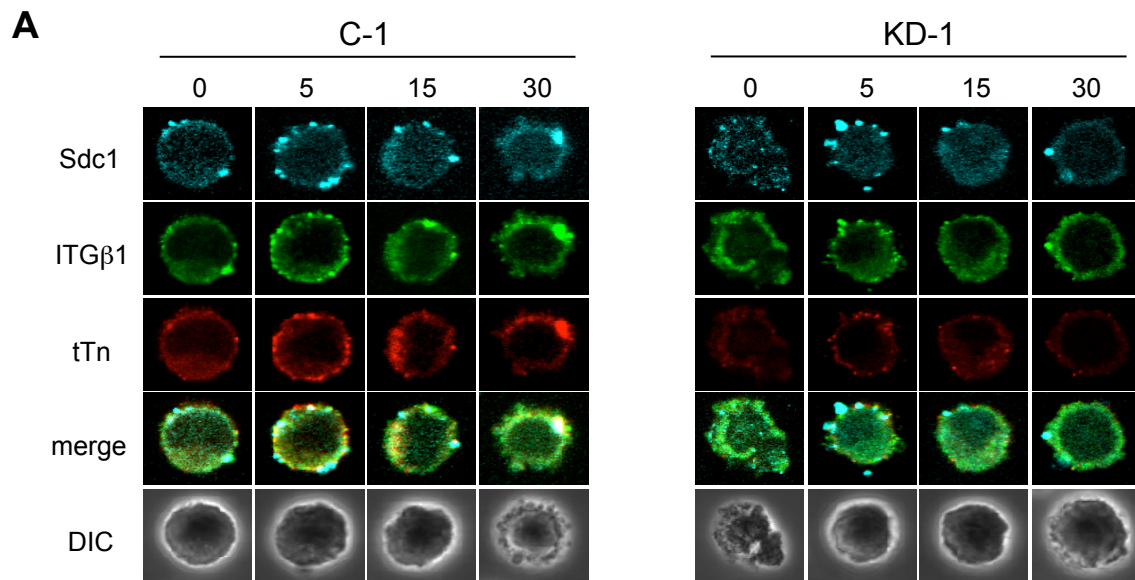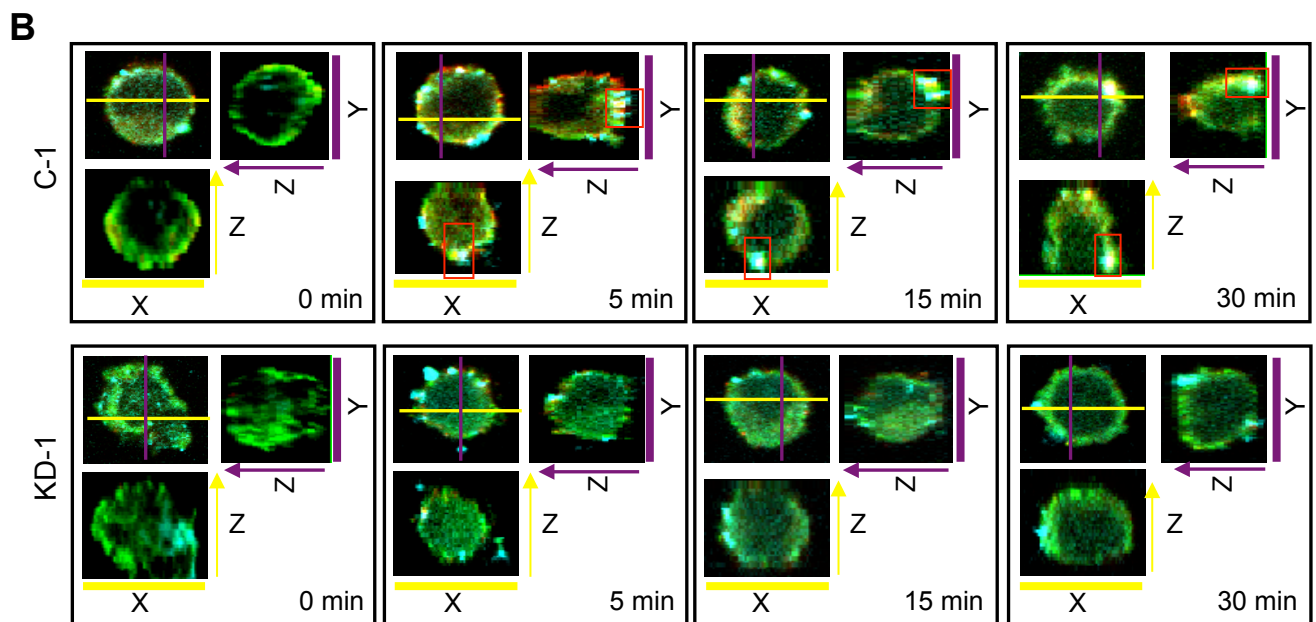

Supplemental Fig. S5

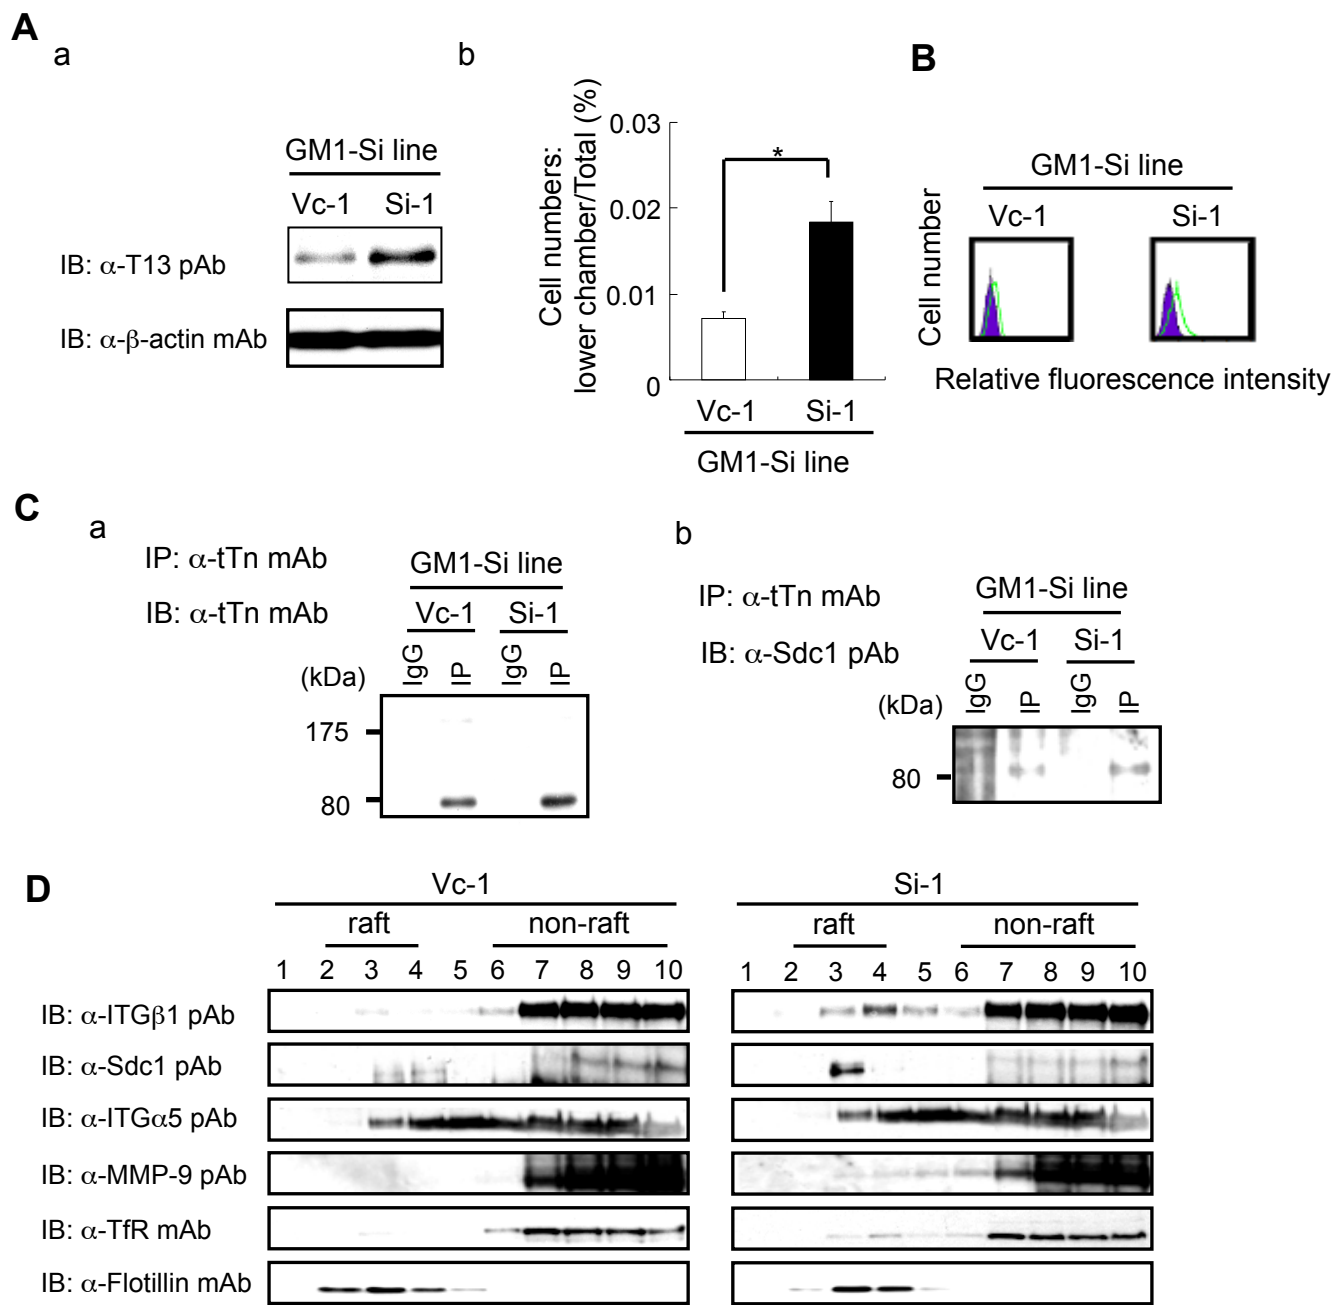

Supplemental Fig. S6

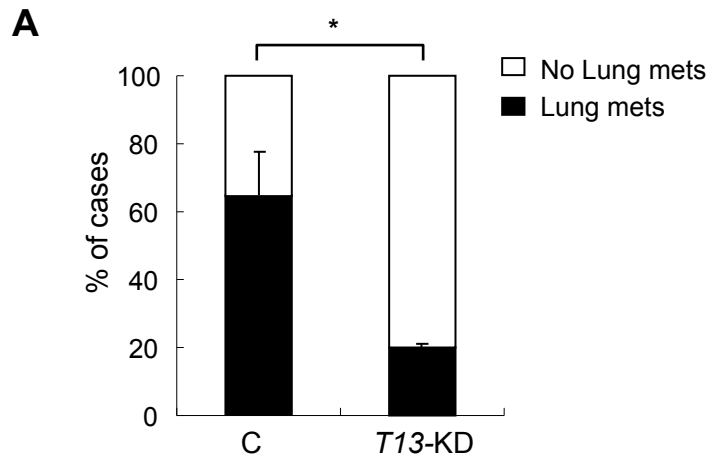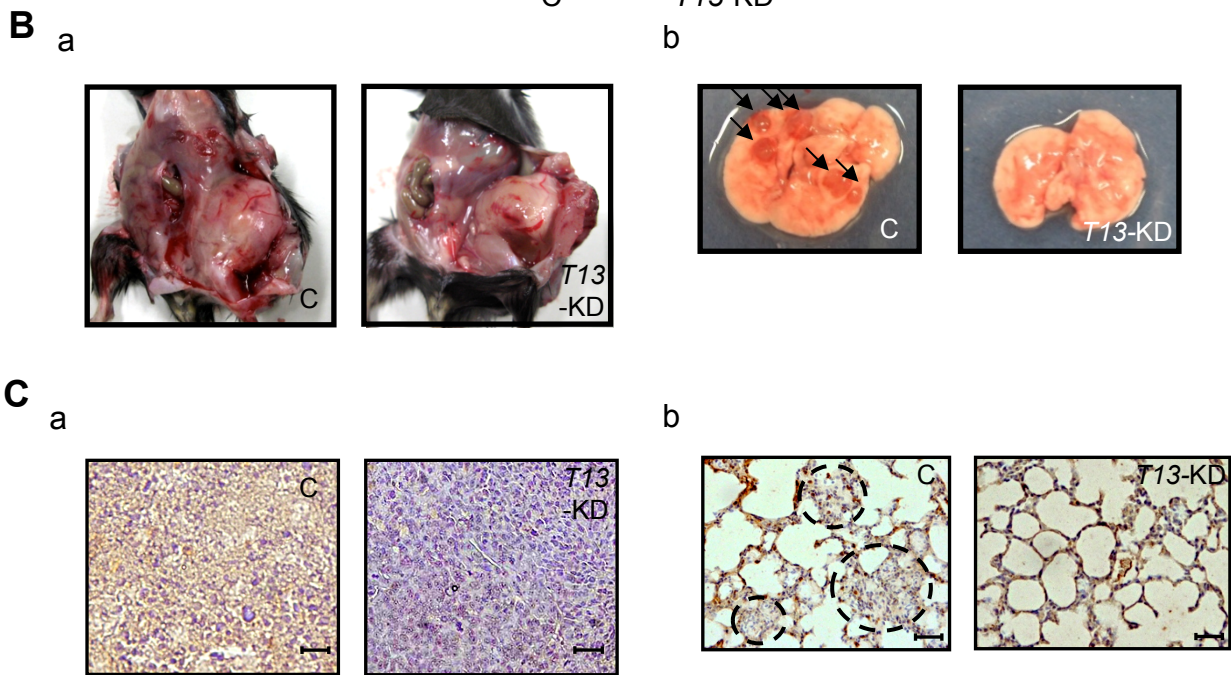

Supplement: supp_M113.455006_jbc.M113.455006-1.pdf [file supp_M113.455006_jbc.M113.455006-1.pdf]
